# Supplementary material
Source: PubMed Central journal article supplement (PMC3486187)
Supplement: MCB.00566-12_zmb999109744so1.pdf [file MCB.00566-12_zmb999109744so1.pdf]

## Supplemental information

Table S1. Chr3 Primers used for qPCR

| Distance (kb) |                           |                          |
|---------------|---------------------------|--------------------------|
| -56.59        | CCAAAGCGTCATGGACATCT      | AGGCCCATCATTCTACTACTGG   |
| -48.148       | CACGCCTAGTTTCAGCTTGTTT    | CTTCAAGACATAATCAACGACGC  |
| -29.91        | TCGTCGTCGCCATCATTTTC      | GCCCAAGTTTGAGAGAGGTTGC   |
| -16.712       | CGTCTTCTCAGCGAACAAACAGC   | CGTCTTCTCAGCGAACAAACAGC  |
| -9.592        | TCAGGGTCTGGTGGAAAGGAATG   | CAAAGGTGGCAGTTGTTGAACC   |
| -5.358        | ATTGCGACAAGGCTTCACCC      | CACATCACAGGTTTATTGGTTCCC |
| -0.186        | CATACAGAAACACAGCGG        | AGGAAGGAACAGGAATCTGG     |
| 0.183         | CCTGGTTTTGGTTTTGTAGAGTGG  | GAGCAAGACGATGGGGAGTTTC   |
| 5.453         | GGACTGGTTATAGACGATGAAGTGT | AAGTCGTCCTTCTTCTTGCTCC   |
| 9.187         | TGGATCATGGACAAGGTCCTAC    | GGCGAAAACAATGGCACTCT     |
| 18.206        | CGGTCCTCGATTTTGTTACCTTC   | GCAAGGATATTCCTGCCTTTTTC  |
| 26.869        | GGAAAGACTGGCTCATCAAAAC    | ACATTCTCAGAGAGAACCTCCA   |
| 47.693        | ACACCCTGAATGGGGAAAC       | CTGCATGGGTGCTTGATG       |
| 61.721        | ATCTCAGCCAGCTGCTGG        | CCCTCTATCTGTCCTTCTGC     |
| 69.192        | AACAACGGTGAACGGTGCTG      | GCAGTAGAAACCTGGGATGTGG   |

Table S2. Chr6 Primers used for qPCR

| Distance (kb) |                          |                               |
|---------------|--------------------------|-------------------------------|
| -62.387       | CTGTTACTGACCAAGCTTCCTA   | TTCACCAGTGGTAGGCTC            |
| -52.502       | GATGAGAAGGTGTACCACACG    | GAGCGTCACAACGTCAGA            |
| -42.42        | TTGGAATAAAGGTGAAGGTTTCC  | CCACGACTCATATCATTACCAAGA      |
| -32.588       | TTCTGCATGGAATGGAGGAT     | CTTCAGATGCTATCGCAGCTA         |
| -17.512       | TCTAGGACATCGTTCATTTCCA   | TTGGATACTACTTTACCTGCAGA       |
| -8.302        | CGTTCAAGATTACAGCAATGCC   | TACCCGGTCGACCATATTGA          |
| -3.849        | CATACAGAAACACAGCGG       | AGGAAGGAACAGGAATCTGG          |
| -3.515        | GCAGCACGGAATATGGGA       | TAAGTCTCTTCTTATATAAATGTCATAGA |
| -2.471        | GGTCCCCTTTCCGATTT        | TTGCACCACGTAGAACTCAG          |
| -0.95         | GATATAAAATGCTCCAACGTCACA | AGGTGCGACAATGTTCACTG          |
| -0.172        | GCTCAGTGTGCGTTATGCTT     | CCTGGTTTTGGTTTTGTAGAGTGG      |
| 1.488         | ATGTTCCGGGATTCCAATA      | ATTATTCCTTTGCCCTCGGA          |
| 5.127         | GACTTAATGGTAGCAAACGTAGTG | CACACGCCCCGAATTATTGTT         |
| 10.086        | GCTTCGTTGTTTCTGATTGCAG   | AGCGCGAAATAACGTTCTGA          |
| 20.097        | ATTCAACTGTTGCGGTTCCG     | TCTTCTGTCTCAACTGTCTTAGCC      |
| 30.085        | TCAGAGATTCAACAGAGGGATGT  | CAAATCTTCGAGGATCGAACTG        |
| 40.079        | GGTCAGGTTTTATTGCAGAATG   | CCGTCAGAGGTTTAGAACTTGTAGA     |
| 55.088        | GCAAGTTCTAGTGGAGAATAAGG  | GATCATTCTCCGCTCCTT            |

The distances listed for Chr 6 are based on a sequence containing the *HMRα::LEU2* sequence. The Chr 3 sequence includes the pair of inverted TY's proximal to *MAT(40)*. All distances are calculated using the more distal end of the PCR product.

## Supplemental Figure legends

**Figure S1. Homologous recombination assays used in this study.** A) Strain YJK17 is used to study kinetics of inter-chromosomal (or ectopic) gene conversion. A HO induced break at the *MAT* locus on Chr3 is repaired using an ectopic *MATa-inc* donor present on Chr 5 by gene conversion B) Strain YMV80 repairs an HO break by single strand annealing using a flanking donor 25kb away from the cut site resulting in the deletion of all the intervening sequences C) Strain JRL346 repairs the HO break on Chr 5 by break-induced replication as only one end of the DSB shares homology with its donor sequence on Chr 11. A successful BIR event results in the non-reciprocal translocation of Chr 11 sequences, the loss of the HPH marker on Chr 5 and the restoration of the coding sequence of the *CAN1* gene.

**Figure S2. Micrococcal nuclease digestion of nucleosome arrays.** In a 200  $\mu$ l reaction, wild type H2A, H2A S129A or H2A S129E – containing nucleosome array (~180 ng DNA equivalents) assembled on pBlueScript SK(-) was incubated with 2 units of MNase at room temperature. Digestion was stopped by 80  $\mu$ l of 1% SDS 0.1M EDTA at indicated time points. Asterisks denote lanes with partial or total loss of DNA pellet during sample preparation.

**Figure S3.** Deletion of *HTZ1* does not suppress *fun30 $\Delta$* 's adaptation defect. The indicated strains were micro-manipulated onto YEP-GAL plates, as described in materials and methods and Fig 8A and monitored for adaptation at 24 hr. Error bars reflect the range from 2 independent experiments.

**Figure S4. Over-expression of ExoI causes faster and more extensive resection.** A. *GAL::EXO1* carried on a plasmid was over-expressed at the same time that *GAL::HO* creates a DSB in a donorless strain, with or without *fun30 $\Delta$* . PCR products were amplified using primers located at different distances from the DSB. Template DNA was isolated from galactose-induced cells at the times shown. All values were normalized as described in Fig 3.

**Figure S5. *fun30 $\Delta$*  exacerbates camptothecin sensitivity of *sgs1 $\Delta$*  and *exo1 $\Delta$* .** Ten-fold serial dilutions of the indicated strains were plated on YEPD plates with and without 3mM camptothecin.

**Figure S6. *fun30 $\Delta$*  increases the rate of non-homologous end joining.** JKM179 and *fun30 $\Delta$*  derivatives were diluted such that roughly 100 cells were plated on YEPD and 100 fold more plated on YEP-Galactose plates; for *yku70 $\Delta$*  derivatives approximately 10,000-fold more cells were plated. The percentage viability was calculated by dividing the number of colonies of galactose plates to those on YEPD plates, corrected for dilutions. Error bars reflect the standard deviation of 3 independent experiments.

**A** YJK17 Gene conversion

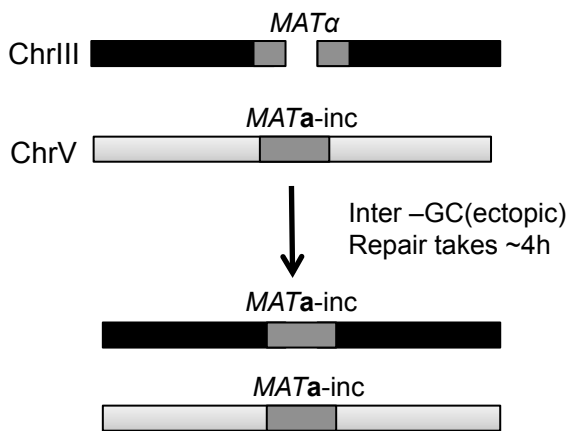

**B** YMV80 Single strand annealing

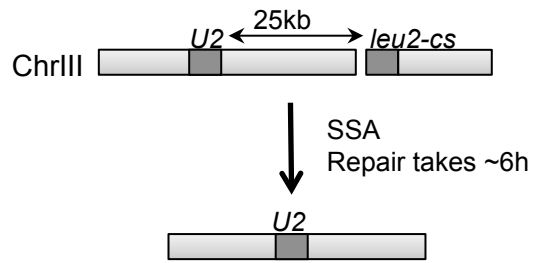

**C** JRL346 Break induced replication

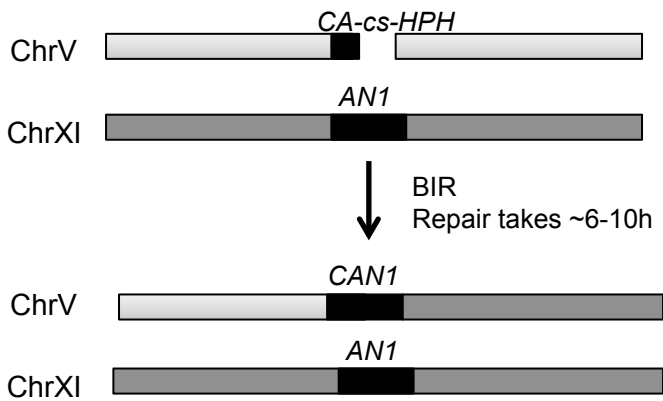

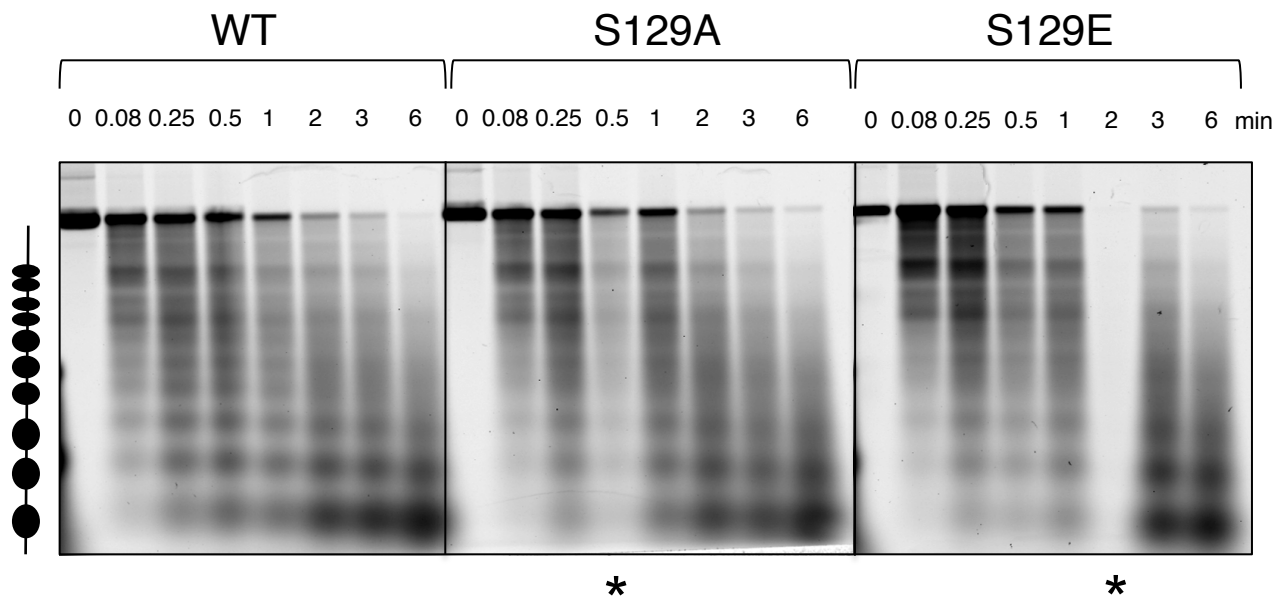

Supplemental Figure 2

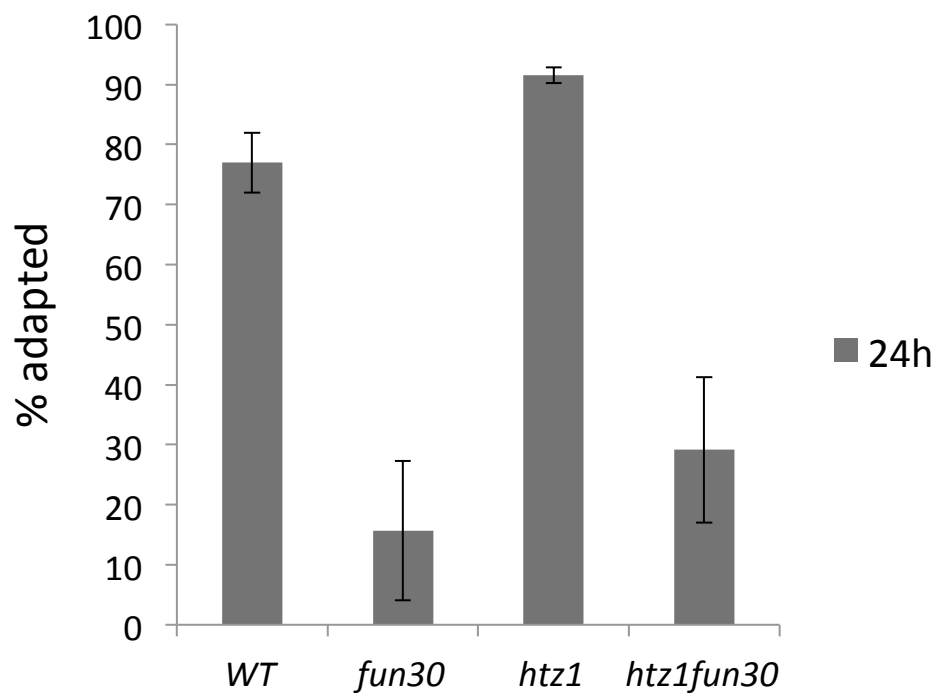

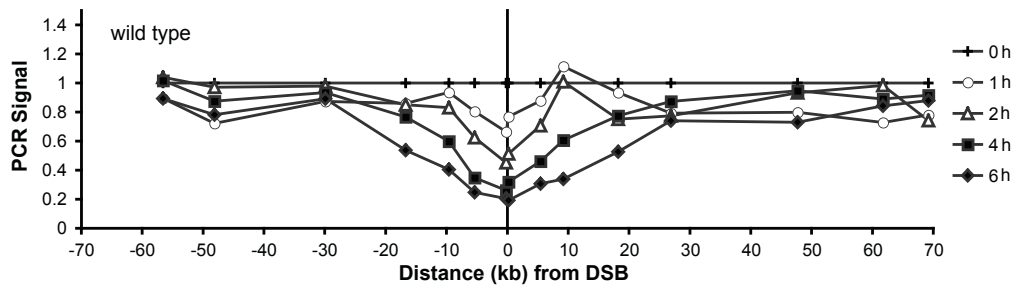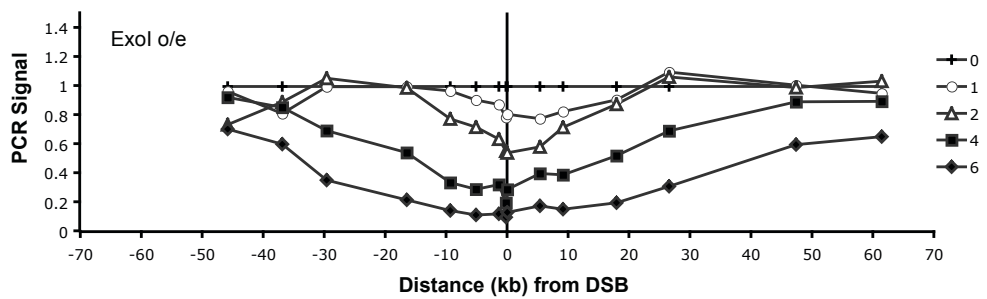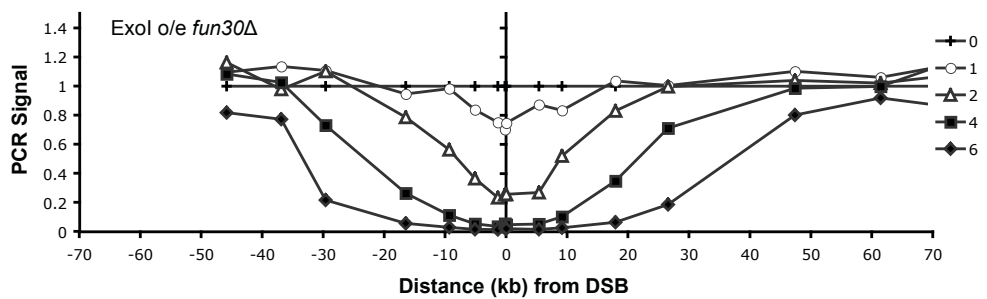

Supplemental Figure 4

WT

*fun30Δ*

*sgs1Δ*

*sgs1Δ fun30Δ*

*exo1Δ*

*exo1Δ fun30Δ*

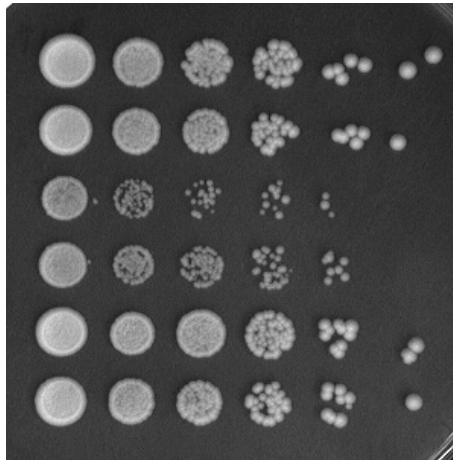

YEPD

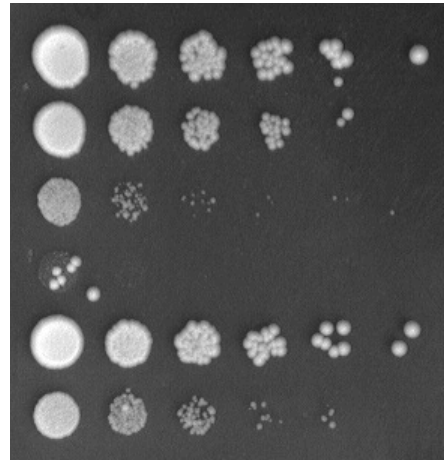

CPT 30 uM



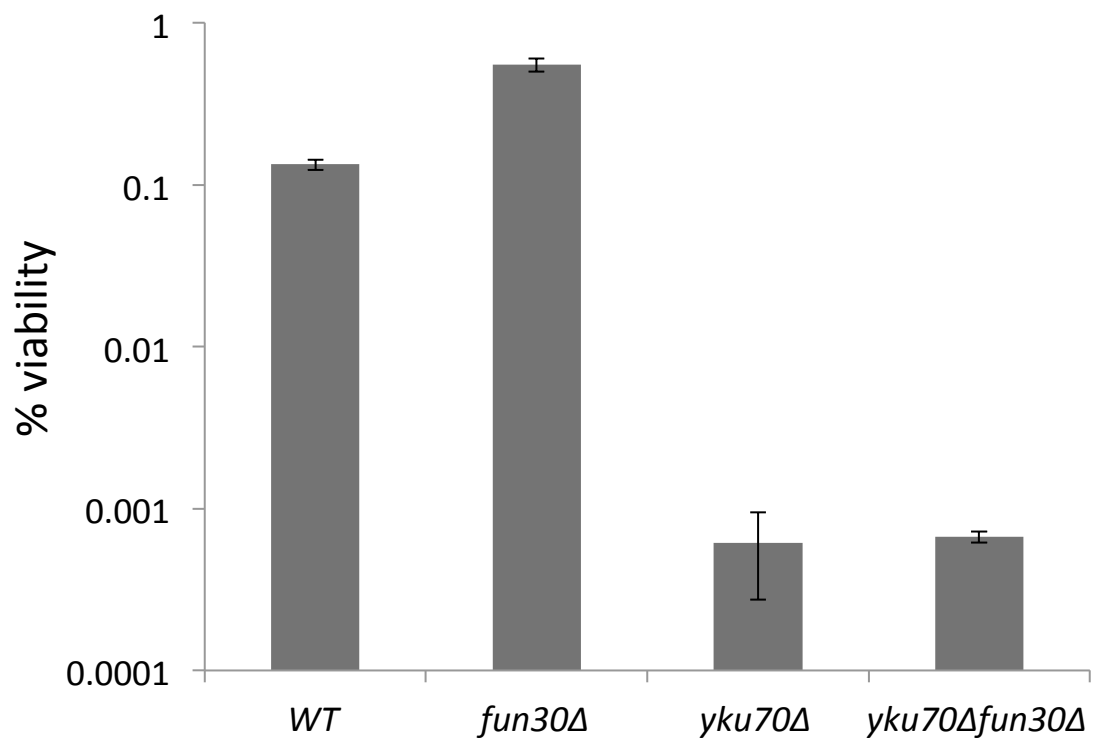

Supplemental Figure 6
